# Supplementary figures and images for: Measurement report: Atmopsheric new particle formation in a peri-urban site in Lille, Northern France
Source: Copernicus journal article supplement (doi:10.5194/acp-2022-436), 2022-07-20

Supplementary material to :

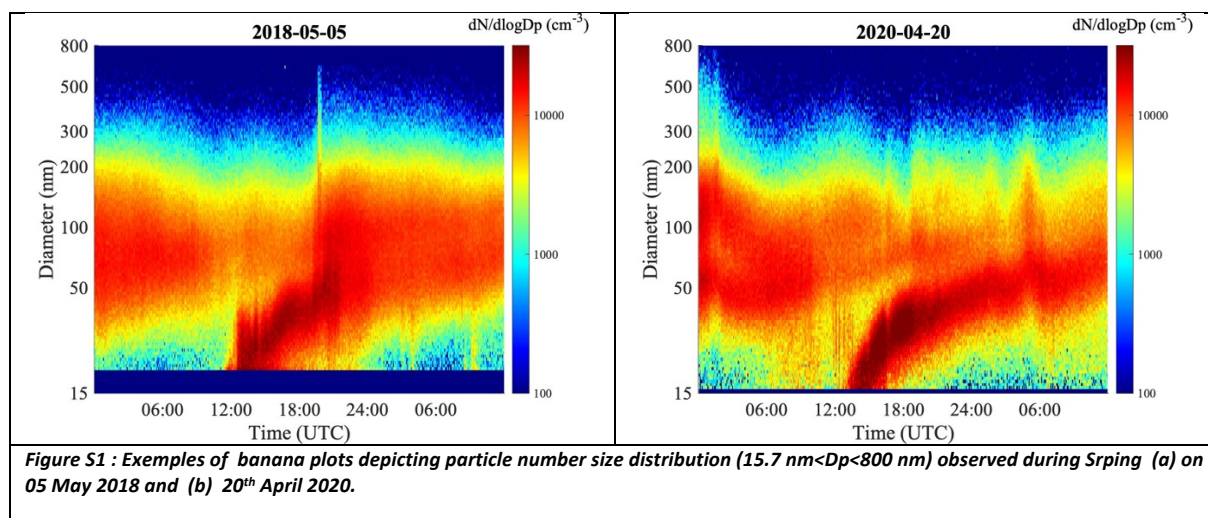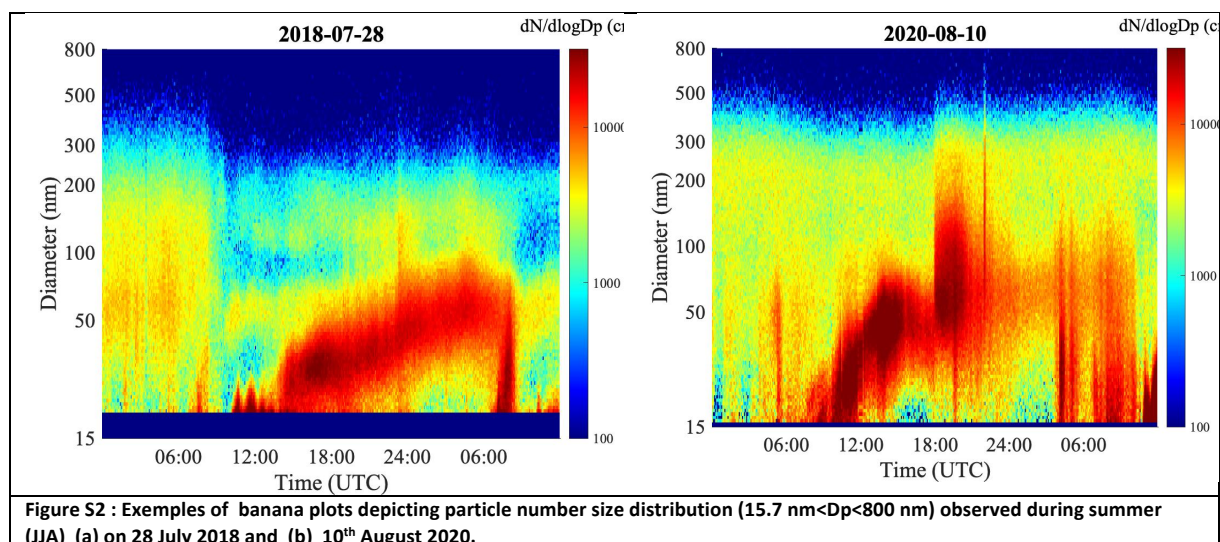

Supplement: Supplementary file 1 [file acp-2022-436-supplement.pdf]
